# Supplementary material for: Evaluation of model-derived root-zone soil moisture over the Huai river basin
Source: Copernicus journal article supplement (doi:10.5194/hess-2023-33), 2023-03-06
Supplement: Supplementary file 1 [file hess-2023-33-supplement.pdf]

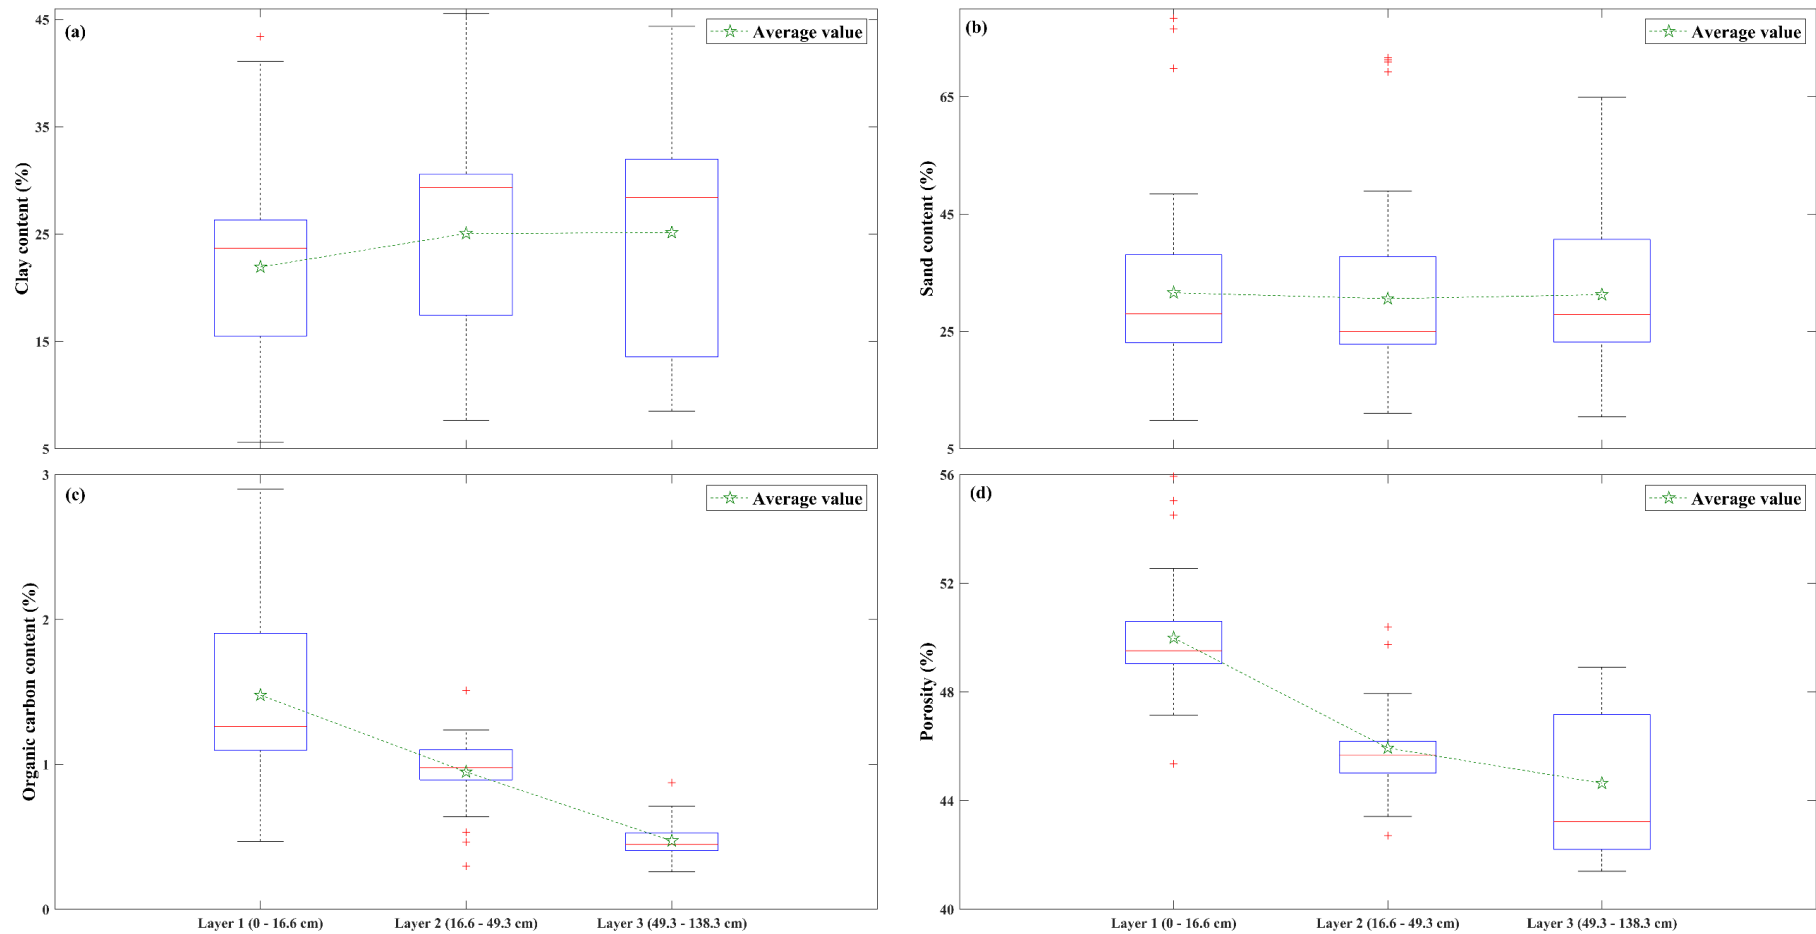

Fig. S1 Soil properties (clay and sand content, organic carbon content and porosity) of three soil layers (Layer1: plough layer; Layer 2: black soil layer; Layer3: lime concretion layer) HRB at different stations.

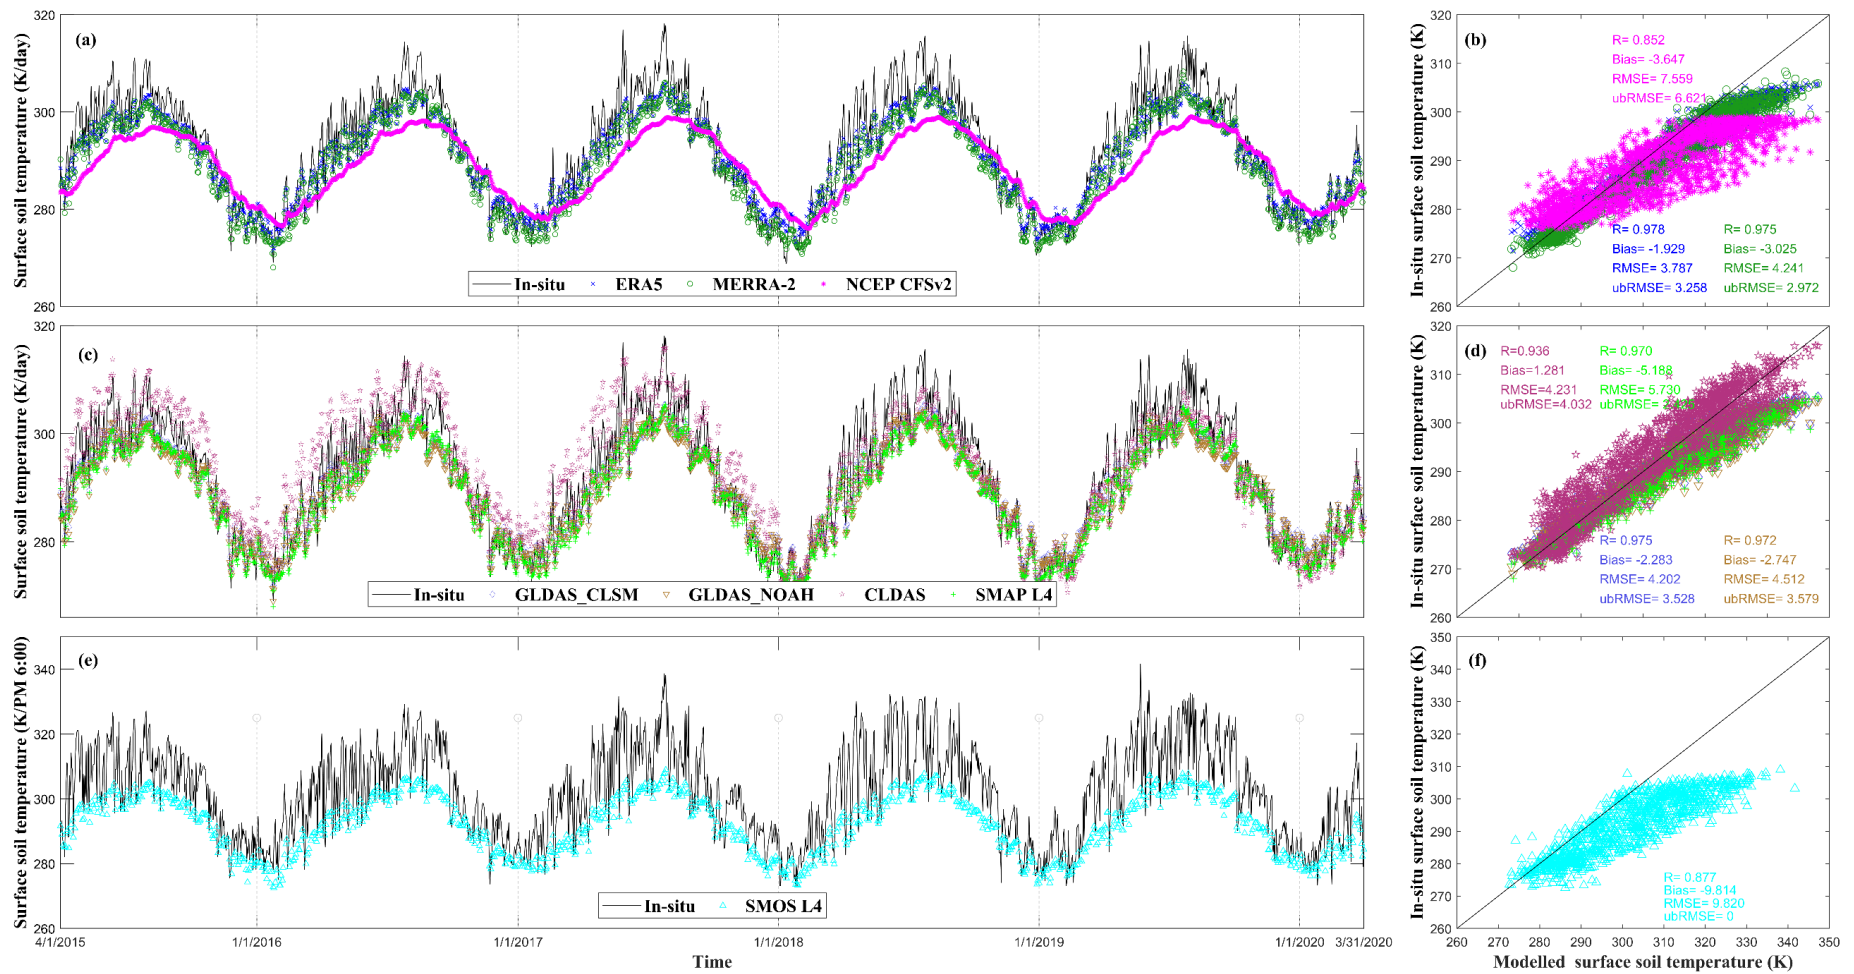

Fig. S2 Comparison between model-derived surface soil temperature and in-situ observations.

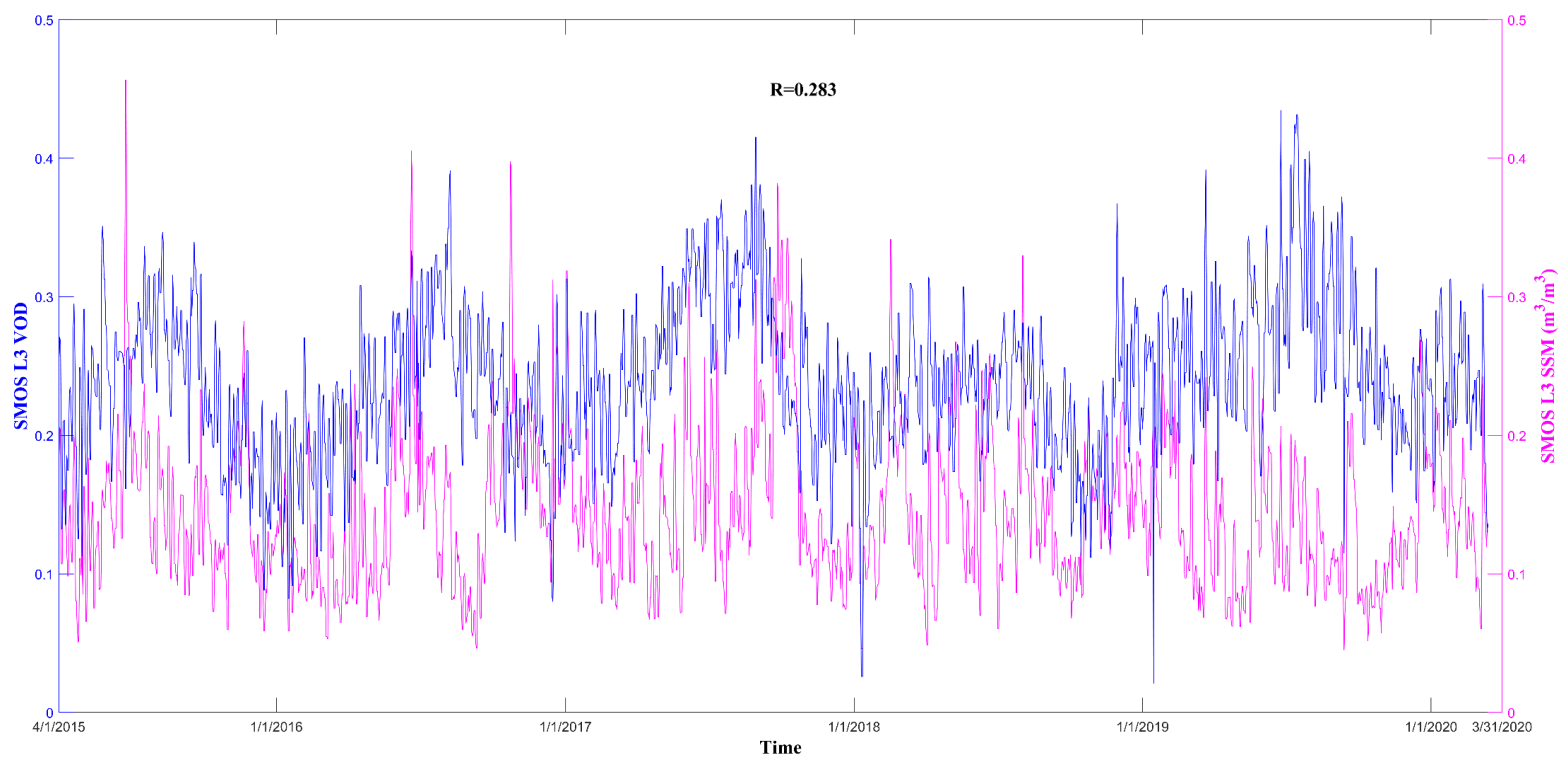

Fig. S3 Time series of SMOS L3 VOD and SMOS L3 soil moisture.
